# Supplementary material
Source: MDPI journal article supplement (https://www.mdpi.com/2073-4441/13/2/182)
Supplement: s1 [file s1]

# Transport of Gaseous Hydrogen Peroxide and Ozone into Bulk Water vs. Electrosprayed Aerosol

Mostafa Elsayed Hassan, Mário Janda and Zdenko Machala \*

*Division of Environmental Physics, Faculty of Mathematics, Physics and Informatics, Comenius University, Mlynská Dolina, 842 48 Bratislava, Slovakia*

mostafa.hassan@fmph.uniba.sk

\* Correspondence: ZM machala@fmph.uniba.sk; MJ mario.janda@fmph.uniba.sk

## Supplementary Materials

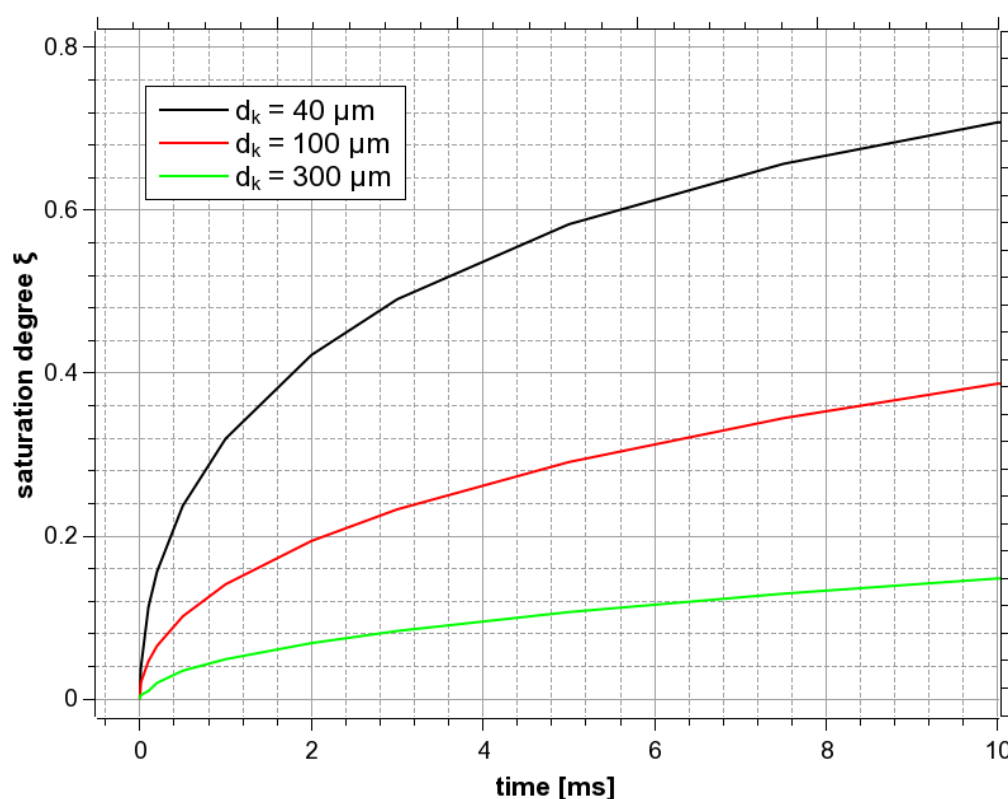

**Figure S1.** Estimated evolution of saturation degree  $\xi_{\text{O}_3}$  of  $\text{O}_3$  as a function of time and diameter of flying microdroplets  $d_k$ , calculated for  $\text{O}_3$  diffusion in the water microdroplets at 300 K, time span up to 10 ms.

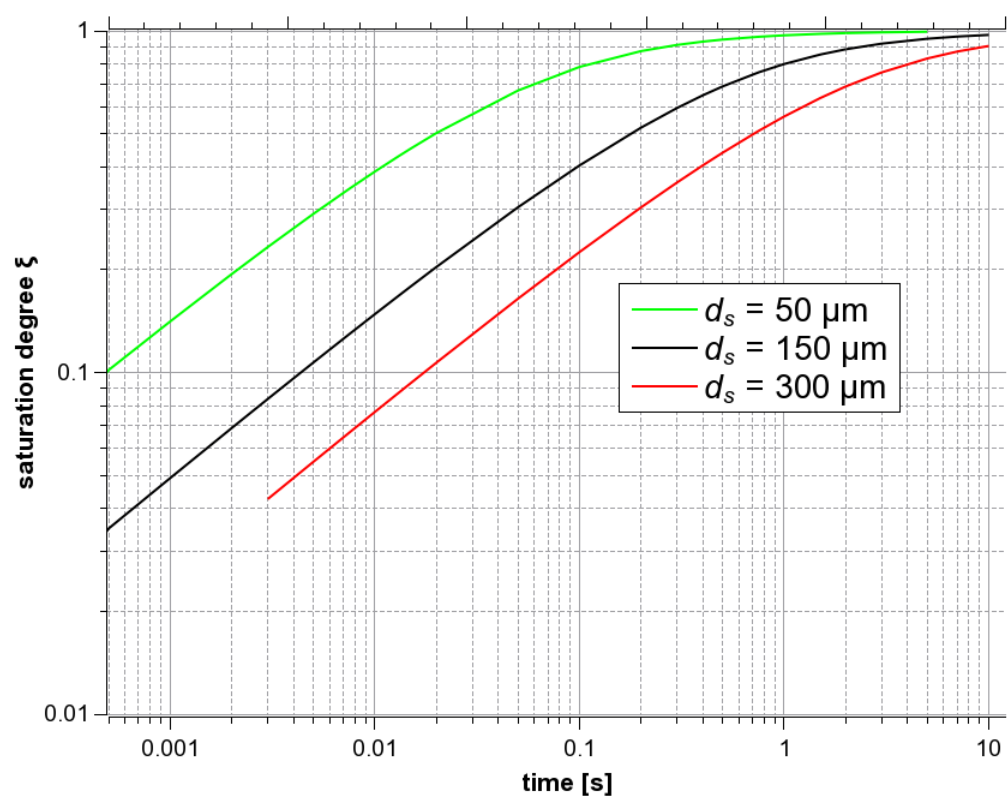

**Figure S2.** Estimated evolution of saturation degree  $\xi_{O_3}$  as a function of time and diameter of sitting bottom microdroplets  $d_s$ , calculated for  $O_3$  diffusion in the water at 300 K, time span up to 10 s.
